# Supplementary material
Source: PubMed Central journal article supplement (PMC7974383)
Supplement: NIHMS1670243-supplement-Supplemental_figures_tables.pdf [file NIHMS1670243-supplement-Supplemental_figures_tables.pdf]

## **Supplemental Information**

## Supplemental Experimental Procedures

**Generation of knockout mice.** Mouse genomic DNA harboring the *Emi2* locus was retrieved from the BAC clone RP23-297G4 (ResGen, PKB986) and introduced into the pBlight-TK vector. Using recombineering technique, loxP recombination sites and a neomycin-selection cassette were introduced flanking the third exon of the mouse *Emi2* genomic locus (Lee et al., 2001). The resulting targeting vector (PKB1034) was linearized by NotI digestion and electroporated into ES cells. Following positive and negative selection with Geneticin and ganciclovir, respectively, genomic DNA from surviving ES cell colonies was used to screen for homologous recombination by Southern hybridization (Fig. 1B). Correctly targeted ES cell clones (3041, 3044, 3051) were identified and used for the generation of the *Emi2* conditional knockout mouse strain. The *Emi2*<sup>fl<sup>ox</sup></sup> allele was generated by crossing *Emi2* conditional knockout mice with  $\beta$ -actin-Flpe transgenic mice (Rodriguez et al., 2000) [strain name: B6.Cg-Tg(ACTFLPe) 9205Dym/J; stock no.: 005703.; The Jackson Laboratory] to remove the neomycin cassette. *Emi2*<sup>fl<sup>ox</sup></sup> mice were then crossed with  $\beta$ -actin-Cre transgenic mice [strain name: FVB/N-Tg(ACTB-cre)2Mrt/J; stock no.: 003376; The Jackson Laboratory] (Lewandoski et al., 1997) to obtain *Emi2*<sup>+/<sup>null</sup></sup> mice that were further intercrossed to obtain *Emi2*<sup>null/<sup>null</sup></sup> knockout mice. *Cdk1*<sup>AF</sup> mice were generated as a conditional knockin strain as has been described previously (Adhikari et al., 2016). Conditional knockin mice were maintained as heterozygous *Cdk1*<sup>+/<sup>LSL-T14AY15F</sup></sup> mice (hereafter referred to as *Cdk1*<sup>+/<sup>SAF</sup></sup>). Upon crossing to  $\beta$ -actin-Cre transgenic mice (Lewandoski et al., 1997), heterozygous knockin mice (*Cdk1*<sup>+/<sup>T14AY15F</sup></sup>, hereafter referred to as *Cdk1*<sup>+/<sup>AF</sup></sup>) displayed early embryonic lethality and died at E3.5 (data not shown). Heterozygous knockin mice crossed to other Cre strains such as *Stra8*-Cre or *ROSA26*-CreERT2 are viable and are referred to as *Cdk1*<sup>+/<sup>AF</sup></sup> *Stra8*-Cre or *Cdk1*<sup>+/<sup>AF</sup></sup> *ROSA26*-CreERT2. *Rosa26*-CreERT2, *Stra8*-Cre, *Mvh*-Cre mice were obtained from Jos Jonkers/Anton Berns, David Page and Kui Liu, respectively.

**Generation of antibodies.** Rabbit polyclonal antibodies against *Emi2* were raised using a mix of two peptides mapping to amino acid residues 234-252 (CGANVTTSVTPVSSLIA KIK) and 585-596 (HKKRGLCSRLAC) of mouse *Emi2* protein, using an established protocol (Berthet et al., 2003). To improve specificity of the antibody, protein extracts from *Emi2* knockout testes were run on polyacrylamide gels and transferred to PVDF membranes. Sera collected post-immunizations were first incubated overnight at 4°C with these membranes and then affinity purified using peptide HKKRGLCSRLAC that does not occur in the knockout sequence because of premature truncation. The specificity of the antibodies was further tested by Western blotting using protein extracts from various mouse tissues. A band of expected size (~72 kDa) was detected in wild-type testis, but not in *Emi2*KO testis and other somatic tissues (Figure S6). A similar procedure was used to raise antibodies against mouse cyclin A1, where we used the peptide CRQSSKSGVALPPVGQG mapping to amino acid residues 3-18. Diluted serum was used for Western blotting against cyclin A1.

**Chromosome spreads and immunofluorescence analysis of mouse testis.** Testes were excised from male mice euthanized at ages P21-P23 and placed in PBS. The tunica albuginea was removed and seminiferous tubules were gently teased apart with blunt forceps. The seminiferous tubules were placed in a hypotonic extraction buffer (30 mM Tris pH 8.2, 50

mM Sucrose, 17 mM Trisodium Citrate Dihydrate, 5 mM EDTA) and incubated for one hour with gentle rotation at room temperature. Small portions of the seminiferous tubules were placed in 100 mM Sucrose pH 8.2 droplets (around 60  $\mu$ l) and pipetted repeatedly (around 50 times) using a cut 200  $\mu$ l tip until the solution turned turbid. Tubular remnants were removed from the suspension. A polylysine coated slide was dipped in freshly prepared fixative (1% PFA, 30 mM Sodium Tetraborate pH 9.2, 0.15% TritonX-100) and the seminiferous tubule suspension was placed at the edge of the slide and allowed to drip along the length of the slide. Slides thus prepared were placed in a humidified chamber at 4°C for 6-12 hours, and stored at -20°C until further use.

For immunofluorescence analysis, slides with chromosome spreads were washed 3 times with PBS, followed by incubation for one hour with blocking buffer (PBS with 0.1% Tween-20 and 10% donkey serum) in a humidified chamber at room temperature. Chromosome spreads were then incubated overnight with primary antibodies diluted in blocking buffer in a humidified chamber at 4°C. Slides were washed three times in PBST (PBS with 0.1% Tween-20) and incubated with appropriate Alexa Fluor-conjugated secondary antibodies diluted in blocking buffer in a humidified chamber for one hour at room temperature. Following three washes in PBST, chromosome spreads were counterstained with DAPI and images were taken using Zeiss Axioimager Z1 epifluorescence microscope.

**Antibodies.** For immunofluorescence analysis, the following antibodies were used: SYCP3 – Santa Cruz Biotechnology #SC-20845, phospho-histone H3 – Cell Signaling #9701,  $\gamma$ H2AX – Upstate #07-164, SYCP1 – Abcam #15090-100, SP56 – QED Bioscience #55101, Emi2 (described above). For Western blotting, the following antibodies were used: Emi2 and cyclin A1 (described above), cyclin B1 – Cell Signaling #4135, Cdk1 and Cdk2 [as described in (Berthet et al., 2003)], HSP90 – BD Biosciences #610418, Actin – Santa Cruz Biotechnology #SC-1616, GAPDH – Cell Signaling #2118.

**Microarray analysis.** For microarray analysis, testis RNA was isolated using Life Technologies' PureLink RNA mini kit. cRNA was prepared with Illumina(r) TotalPrep RNA kit according to the manufacturer's protocol. The triplicate expression data microarrays were normalized using quantile normalization with limma and beadarray in R using the reference database Illumina MouseRef-8 V2. Only probes with an absolute fold change >1.5-fold and a Q-value <0.01 were considered as significantly differentially expressed. Microarray data were submitted to the GEO repository and can be viewed using accession number GSE77309.

**Immunofluorescence analysis of human testes.** Human testicular tissue was obtained from a prostate cancer patient who underwent bilateral orchidectomy as part of his cancer treatment and a patient who underwent Testicular Sperm Extraction (TESE) for Intracytoplasmic Sperm Injection at the Academic Medical Center, Amsterdam, The Netherlands. National Ethical approval was obtained and patients gave informed consent to use their tissues for research purposes. Tissues were fixed in modified Methacarn (89% Methanol and 11% glacial acetic acid) and paraffin-embedded tissues were sectioned and processed for anti-Emi2 antibody immunostaining. Both patients had normal intact spermatogenesis based on testis histology. The images shown in Figure 6H are representative images obtained using tissue from the TESE patient.

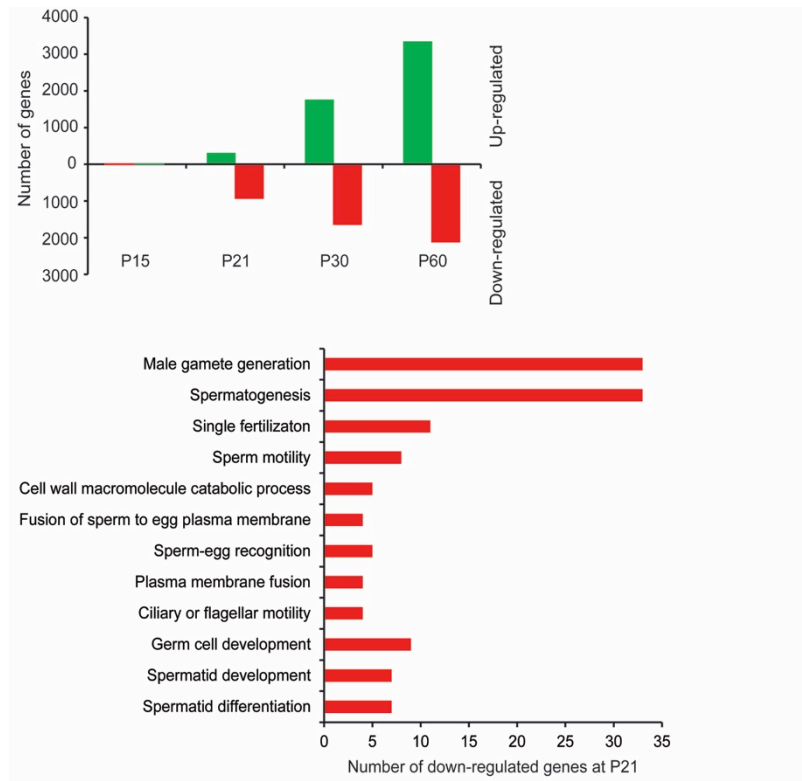

Top genes downregulated at P21

| Gene symbol | Gene name                                                                         |
|-------------|-----------------------------------------------------------------------------------|
| Mycbpap     | MYCBP associated protein                                                          |
| Adam24      | a disintegrin and metallopeptidase domain 24 (testase 1)                          |
| Acsbg2      | acyl-CoA synthetase bubblegum family member 2                                     |
| Capza3      | capping protein (actin filament) muscle Z-line, alpha 3                           |
| Catsper1    | cation channel, sperm associated 1                                                |
| Catsper2    | cation channel, sperm associated 2                                                |
| Catsper3    | cation channel, sperm associated 3                                                |
| Catsper4    | cation channel, sperm associated 4                                                |
| Cep57       | centrosomal protein 57                                                            |
| Csda        | cold shock domain protein A                                                       |
| Ccna1       | cyclin A1                                                                         |
| Ehmt2       | euchromatic histone lysine N-methyltransferase 2                                  |
| Ggn         | gametogenetin                                                                     |
| Ggnbp2      | gametogenetin binding protein 2                                                   |
| Gpx4        | glutathione peroxidase 4                                                          |
| Hils1       | histone H1-like protein in spermatids 1                                           |
| Klhl10      | kelch-like 10 (Drosophila)                                                        |
| Odf1        | outer dense fiber of sperm tails 1                                                |
| Odf2        | outer dense fiber of sperm tails 2; similar to outer dense fiber of sperm tails 2 |
| Odf3        | outer dense fiber of sperm tails 3                                                |
| Acrbp       | proacrosin binding protein                                                        |
| Prm1        | protamine 1                                                                       |
| Prss21      | protease, serine, 21                                                              |
| Spag4l      | sperm associated antigen 4-like                                                   |
| Spata16     | spermatogenesis associated 16                                                     |
| Spata19     | spermatogenesis associated 19                                                     |
| Spata20     | spermatogenesis associated 20                                                     |
| Tssk2       | testis-specific serine kinase 2                                                   |
| Tssk4       | testis-specific serine kinase 4                                                   |
| Txndc2      | thioredoxin domain containing 2 (spermatozoa)                                     |
| Txndc8      | thioredoxin domain containing 8                                                   |
| Tnp1        | transition protein 1                                                              |
| Zfp296      | zinc finger protein 296                                                           |

**Fig. S1. Related to Fig. 3. Gene expression analysis of Emi2 knockout testes.** Microarray analysis of Emi2 knockout testes at ages P15, P21, P30, and P60 (n=2 per genotype/age) revealed zero differentially regulated genes at P15. Genes downregulated from P21 onwards included those involved in spermatogenesis as well as sperm function.

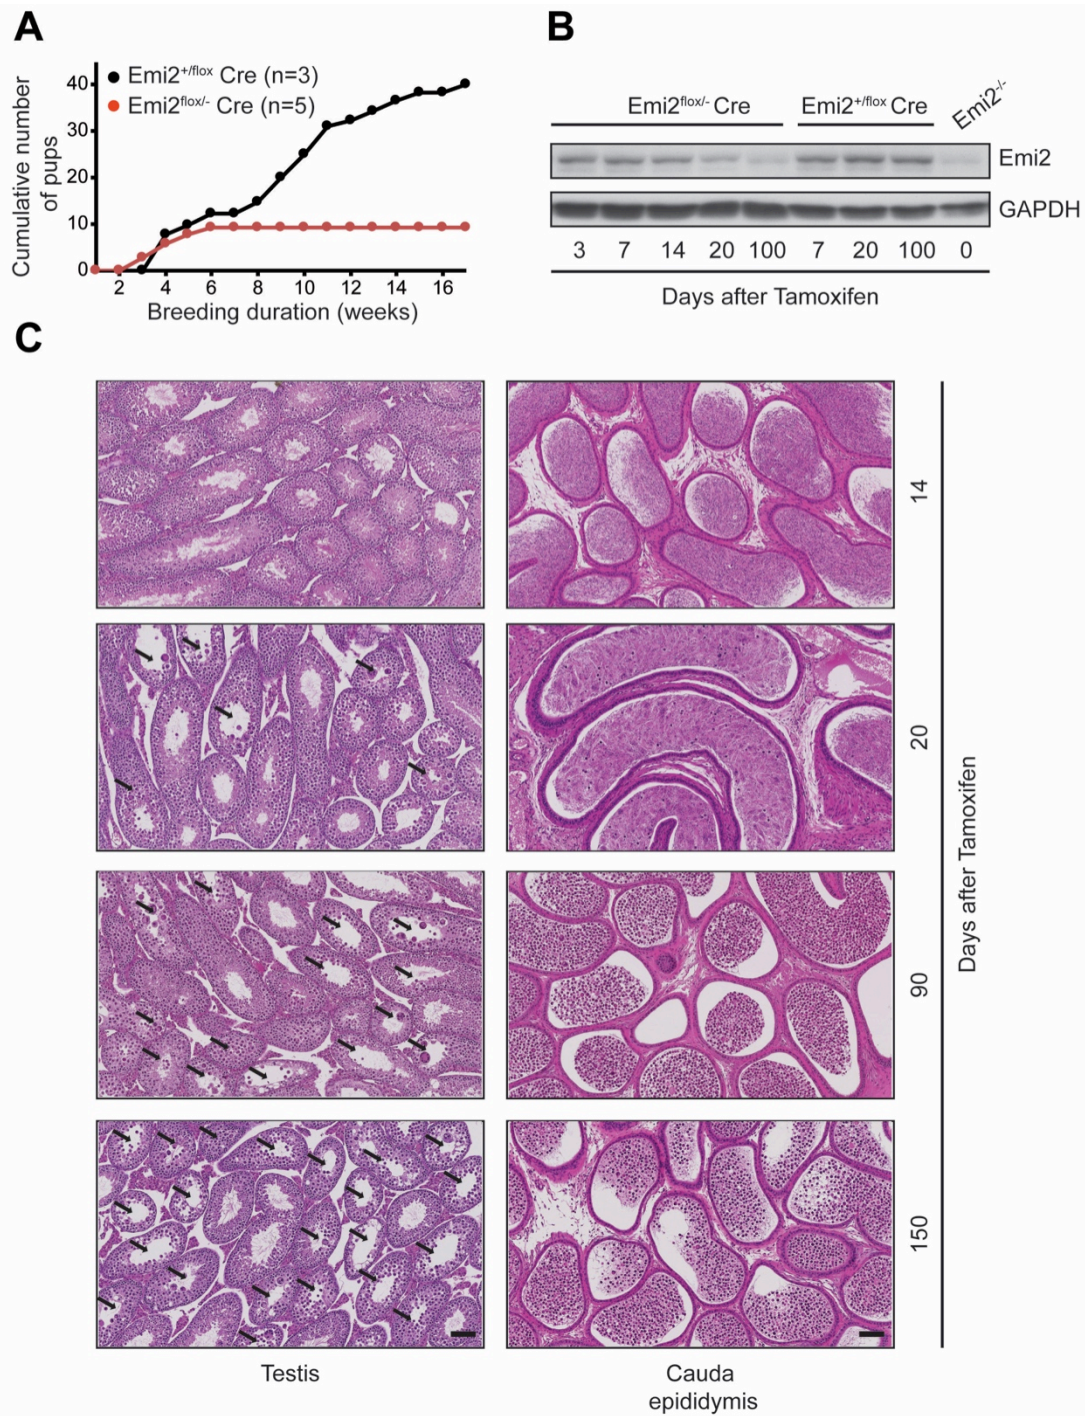

**Fig. S2. Related to Fig. 3. Deletion of Emi2 in adult male mice results in sterility.** (A) Emi2<sup>flox/-</sup> ROSA26-CreERT2 adult male mice (n=5) or littermate controls (n=3) were injected with tamoxifen and bred with wild-type females for 12-16 weeks. (A) Graph depicts the average cumulative number of pups born to one male mated with two females over the breeding period. (B-C) Emi2<sup>flox/-</sup> ROSA26-CreERT2 adult male mice or littermate controls (n=2) were injected with tamoxifen and testes were excised at different time points. Protein extracts of testes excised at different time points following tamoxifen administration were subjected to SDS-PAGE and Western blotting with the indicated antibodies (B). Histopathological analysis of testes excised at different time points following tamoxifen administration revealed progressively increasing number of apoptotic diplotene spermatocytes (arrows  $\blackrightarrow$ ) and decreasing number of sperm. Scale bar: 100  $\mu$ m (C).



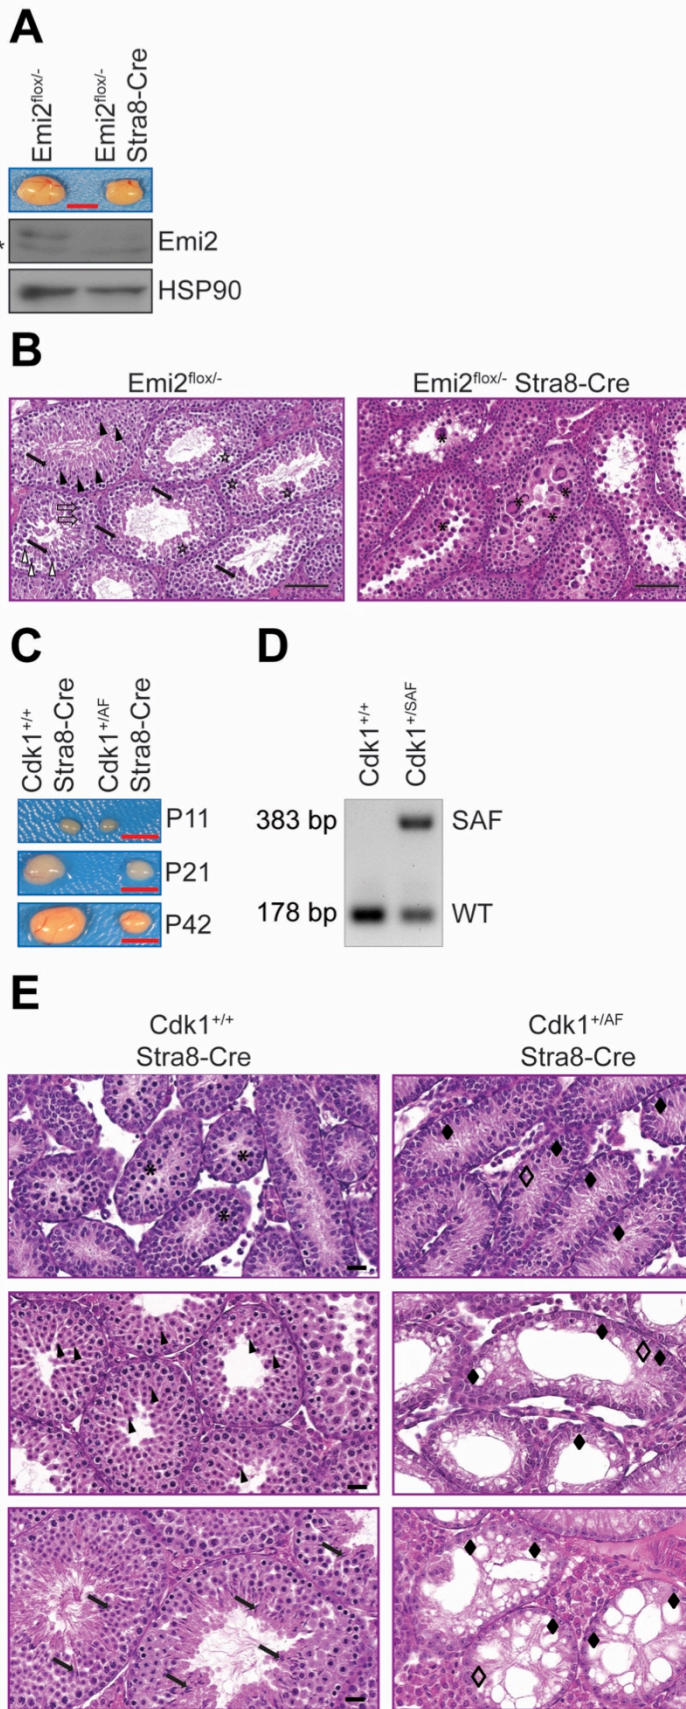

**Fig. S3. Related to Fig. 3. Germ cell-specific knockout of Emi2 and activation of Cdk1<sup>AF</sup>.** (A) Testes from Emi2<sup>flox/-</sup> Stra8-Cre mice are smaller than littermate controls and the absence of Emi2 was confirmed by Western blot analysis. \*Non-specific band. Scale bar 5mm. (B) H&E stained sections from testis from Emi2<sup>flox/-</sup> Stra8-Cre mice display arrest of spermatocytes at pachytene/diplotene I. Open asterisks indicate normal pachytene spermatocytes, open arrows indicate normal diplotene spermatocytes, open arrow heads indicate meiotic metaphases in spermatocytes, black arrow heads indicate round spermatids, black arrows indicate elongating spermatids, asterisks indicate mono- or multi-nuclear apoptotic pachytene/diplotene spermatocytes. Scale bar: 100  $\mu$ m. (C) Testes from Cdk1<sup>+/AF</sup> Stra8-Cre mice collected at various ages are smaller than littermate controls. Scale bar: 5 mm. (D) Presence of Cdk1<sup>SAF</sup> locus was confirmed by genotyping of testis. (E) H&E stained sections from testes from Cdk1<sup>+/AF</sup> Stra8-Cre mice displayed early meiotic arrest, displaying mainly tubules with only Sertoli cells (black diamonds  $\blacklozenge$ ) and only very rare spermatogonia (open diamonds  $\lozenge$ ). In the left panel the most advanced germ cell type is indicated: pachytene spermatocytes in P11 (asterisks \*), round spermatids in P21 (black arrowheads  $\blacktriangledown$ ) and elongated spermatids in P42 (black arrows  $\blackrightarrow$ ). Scale bar: 20  $\mu$ m. Results are representative of 3 mice per genotype.

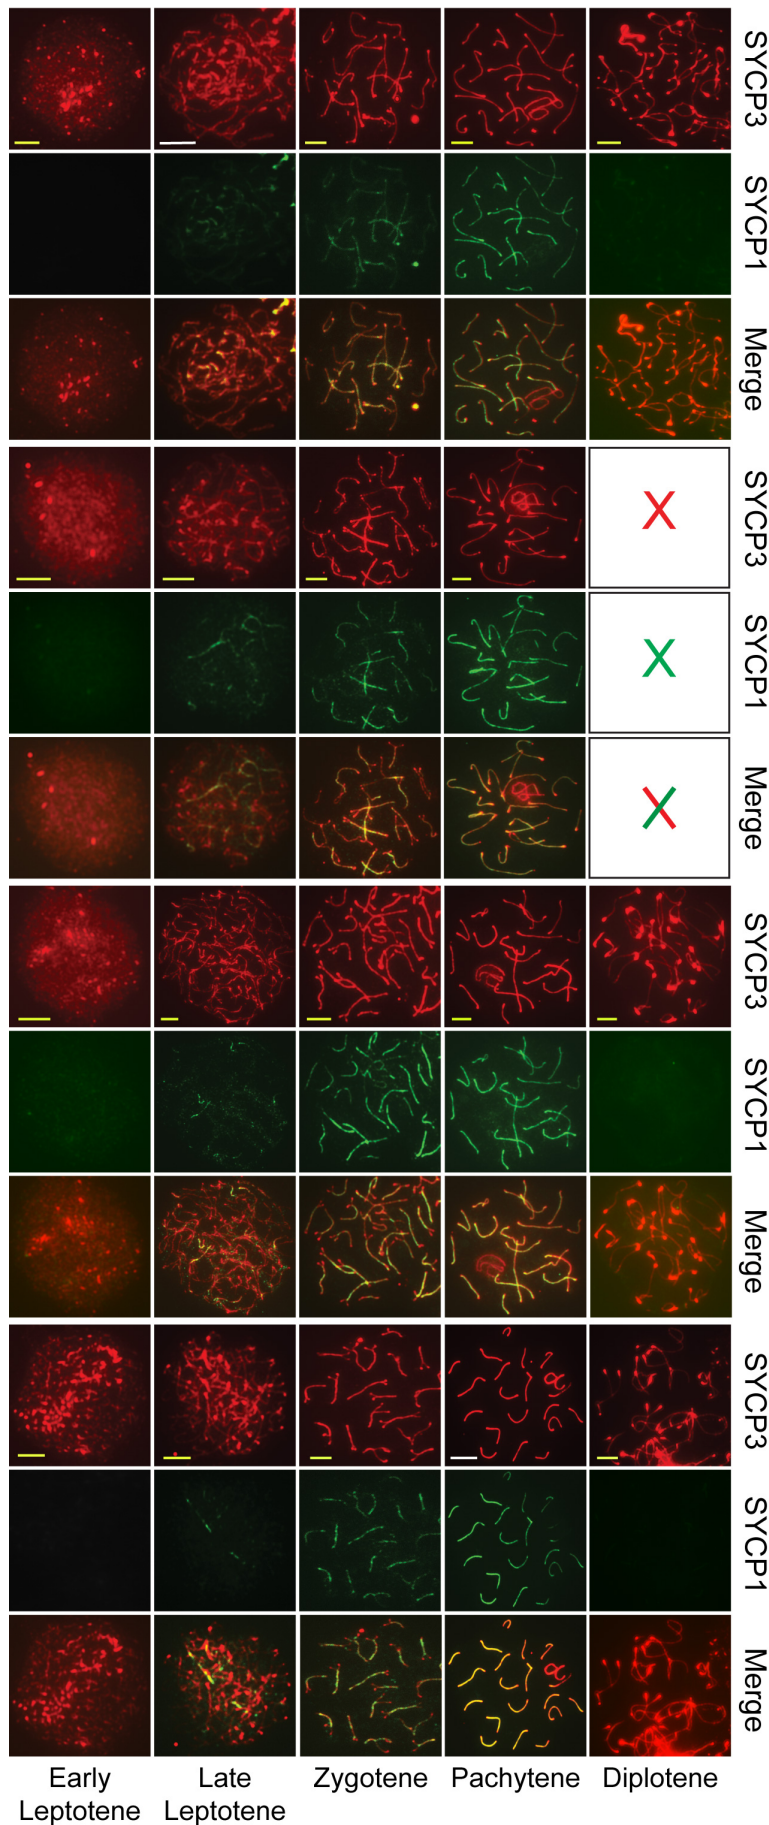

**Fig. S4. Related to Fig. 4. Pachytene synapsis is normal in the presence of elevated Cdk1 activity.**

Testes from  $Emi2^{+/+}Cdk1^{+/+}$ ,  $Emi2^{+/+}Cdk1^{+/AF}$ ,  $Emi2^{-/-}Cdk1^{+/+}$ , and  $Emi2^{-/-}Cdk1^{+/AF}$  mice around 3 weeks of age were used for preparing chromosome spreads that were immuno-stained with the indicated antibodies. For those mice expressing ROSA26-CreERT2, tamoxifen was intraperitoneally injected and testes were excised after 48 hours. Scale bar: yellow 5  $\mu$ m; white 10  $\mu$ m. Results are representative of at least three independent experiments. We observed normal progression through prophase I for  $Cdk1^{AF}$  ROSA26-CreERT2 (+TAM) spermatocytes; but also observed several aberrant diplotene structures with strong phospho-histone H3 staining and discontinuous SYCP3 staining, suggesting defects in relocalization of SYCP3 that is expect upon completion of diplotene. Constitutive activation of Cdk1 resulted in early spermatogonial arrest (as evidenced by presence of tubules with only Sertoli cells), accumulation of DSBs during prophase I, and aberrant SYCP3 relocalization.

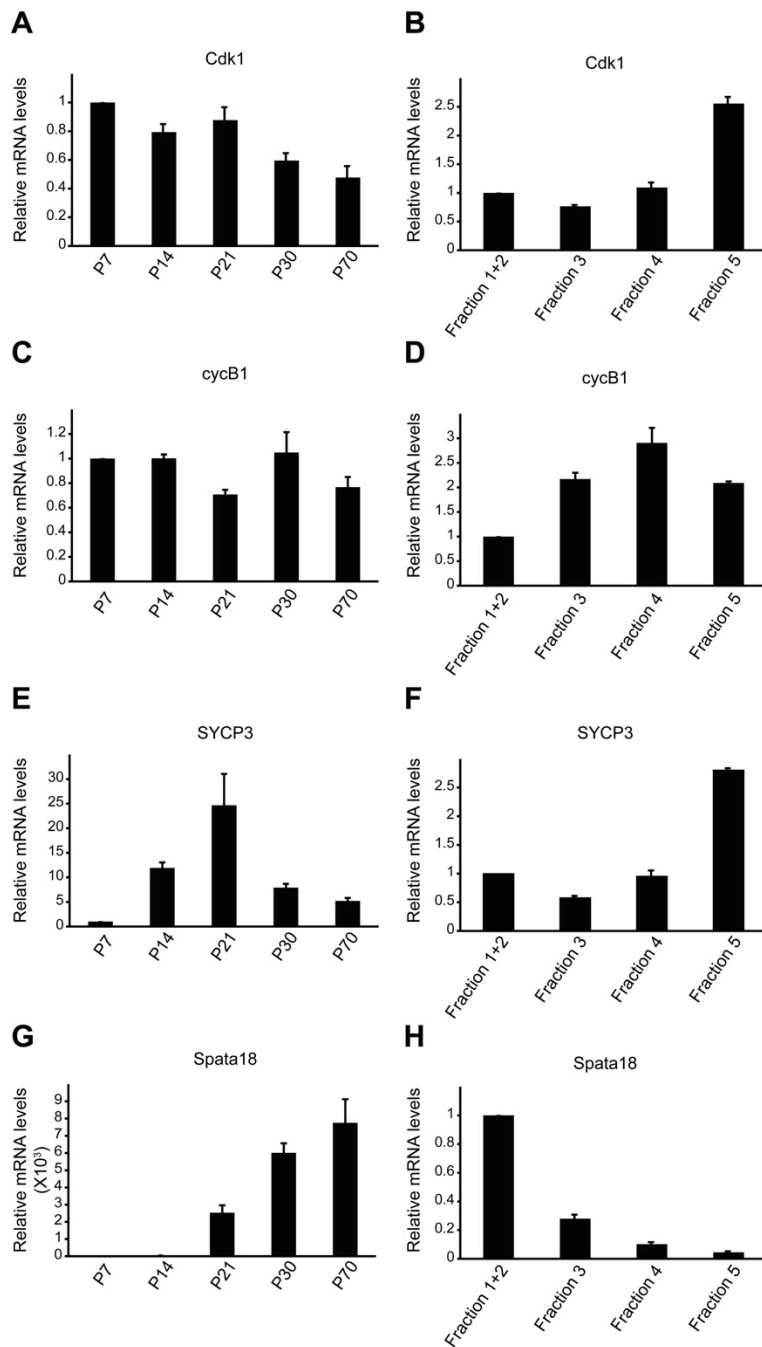

**Fig. S5. Related to Fig. 7. mRNA expression analysis.** Real-time PCR was performed for various genes using RNA extracted from testes at different ages (A-D) or testicular elutriation fractions (E-H). Expression values were normalized to housekeeping gene Elongation Factor 2 (EF2) and expressed relative to P7 (A-D) or Fraction 1+2 (E-H). Cdk1 mRNA expression decreased with age and was present at highest levels in Fraction 5 (spermatocytes). For cyclin B1, no significant differences were found in expression across various ages and expression was detected at higher levels in fractions 3, 4, and 5 (round spermatids and spermatocytes). Expression profiles for spermatocyte marker SYCP3 and spermatid marker Spata18 were as expected. Highest levels of SYCP3 were detected at ages P14 and P21, and in Fraction 5 (spermatocytes). Spata18 expression increased with age and highest levels were detected in Fraction 1+2 (elongating spermatids). Mean values obtained from testes extracted from three mice per age group are reported in (A-D). For (E-H), results are representative of two independent elutriation experiments, with testes from three mice used per experiment.



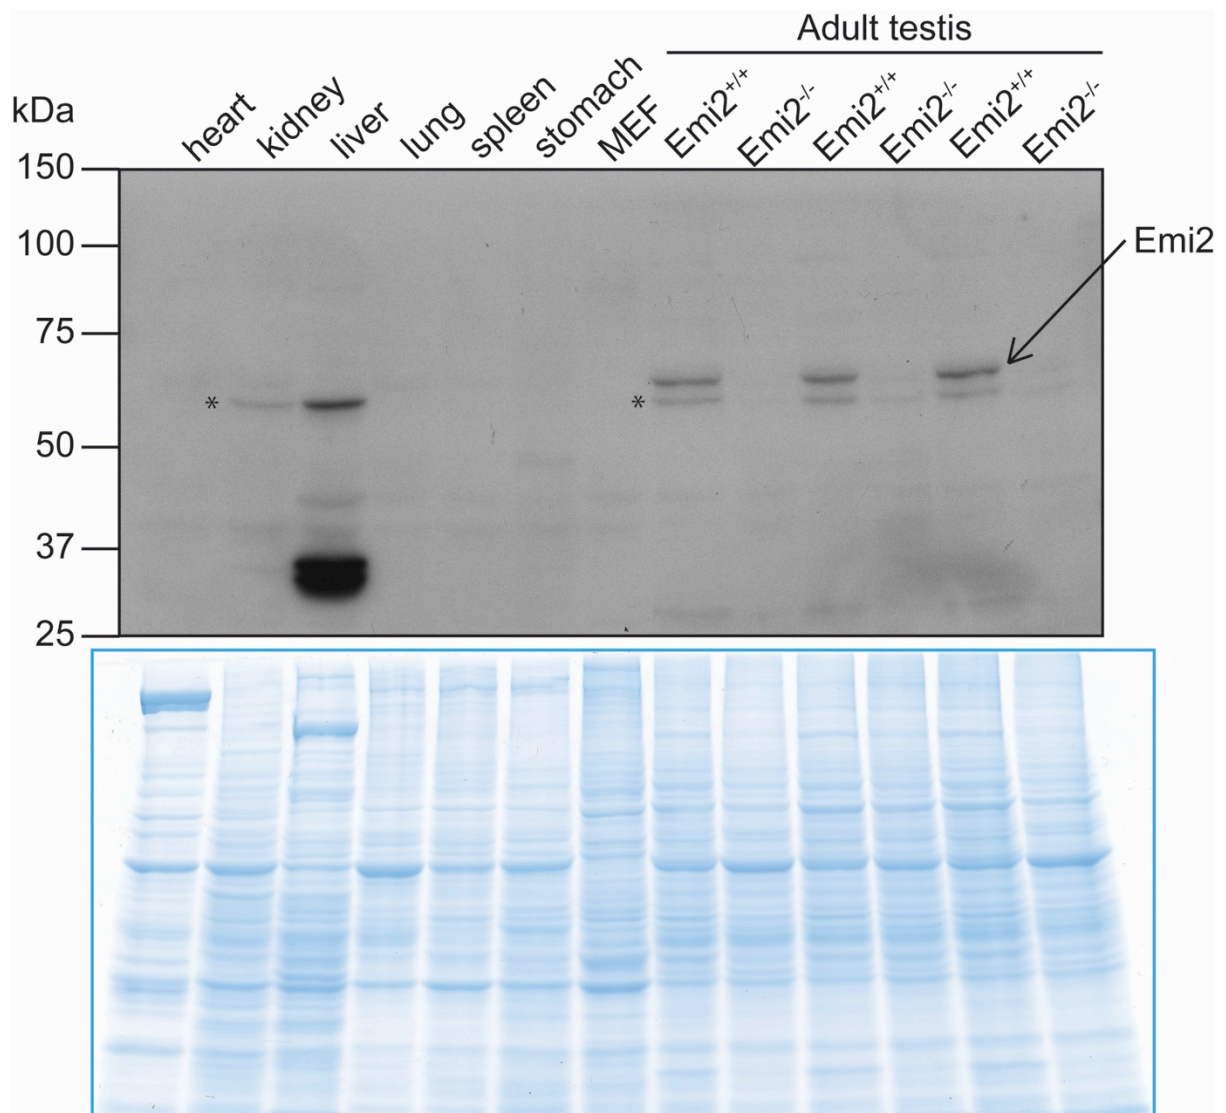

**Fig. S6. Related to Fig. 1 and 7. Validation of antibodies generated against Emi2.** Protein extracts from various mouse tissues including *Emi2*KO testes were resolved by SDS-PAGE and subjected to Western blotting with home-made antibodies against *Emi2*. Specific band of expected size (72kDa) was observed only in wild-type testes. \*Non-specific band observed in kidney, liver, and testes (top panel). Coomassie blue-stained gel (bottom panel) served as loading control. Results are representative of two independent experiments.

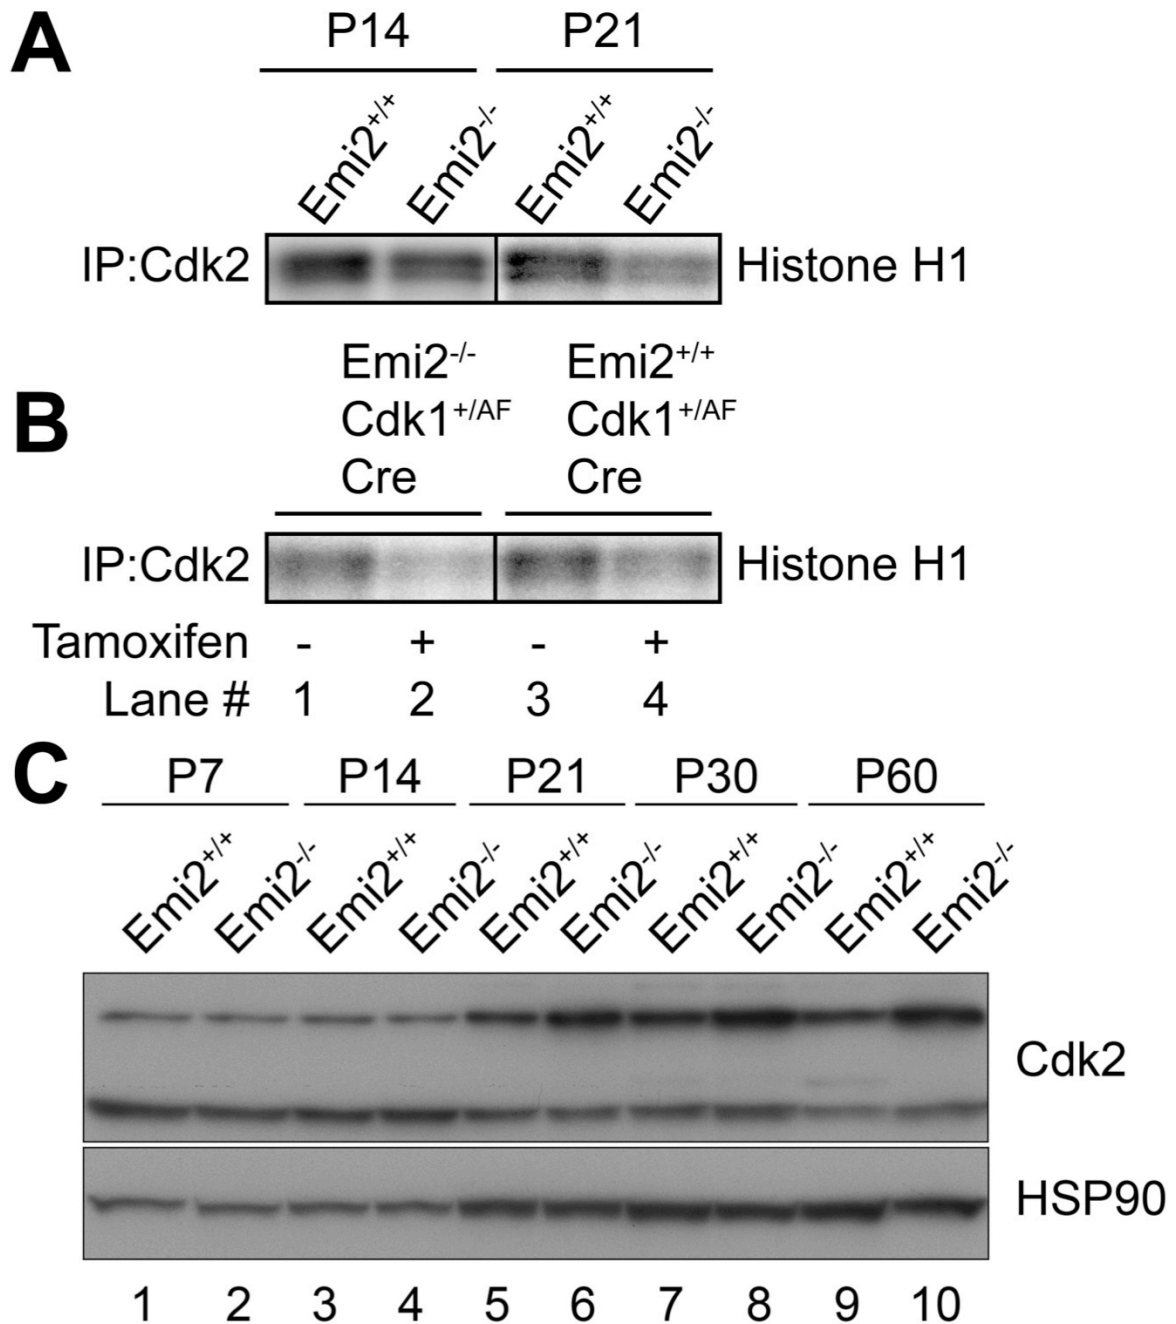

**Fig. S7. Related to Fig. 5 and 7. Cdk2-associated activity is decreased in *Emi2* knockout testes.** Protein extracts from testes isolated from control (*Emi2<sup>+/+</sup>* or *Emi2<sup>+/-</sup>*) or *Emi2*KO (*Emi2<sup>-/-</sup>*) mice at P14 and P21 were subjected to immunoprecipitation (IP) with antibodies against Cdk2 and kinase activity was measured using radiolabeled ATP and histone H1 as substrate (A). Same experiment as in (A) but using extracts of *Emi2<sup>-/-</sup>Cdk1<sup>+/-AF</sup>Cre* and *Emi2<sup>+/+</sup>Cdk1<sup>+/-AF</sup>Cre* (B). Results are representative of at least three independent experiments. (C) Protein expression of Cdk2 in testis extracts from different stages as indicated from wild-type and *Emi2*KO mice. HSP90 serves as loading control. Results are representative of three independent experiments.

**Table S1: Related to Fig. 1. Genotyping and genomic primers**

| <b>Primer name</b>                        | <b>Primer Sequence (5' to 3')</b> |
|-------------------------------------------|-----------------------------------|
| Genotyping primer P1, PKO2025             | CAGAGATTTGCTACATAGAC              |
| Genotyping primer P2, PKO2026             | CCTGTCTGGGGCTACGTTGA              |
| Genotyping primer P3, PKO2028             | ACACAGAGGAATGCAGCAA               |
| 5' Probe Forward, PKO1253                 | TCCTACTTTTATTCCCAACGGTT           |
| 5' Probe Reverse, PKO1254                 | GCAAACATAGCATGCCATAGAA            |
| 3' Probe Forward, PKO1365                 | CTGATGAAGCTTTAAAGCCTTG            |
| 3' Probe Reverse, PKO1366                 | ACATGGAGCAATAAAACACACA            |
| 5'Probe Forward, PKO380                   | GTGTATAATCACAGAAACAGGC            |
| 5'Probe Reverse, PKO381                   | AGTCCCCGCACCTCGTAAC               |
| 3'Probe Forward, PKO382                   | GGTTTGTGTGTAAGCTGTTGTC            |
| 3'Probe Reverse, PKO383                   | TGGCTGCTGACTACTTCAAT              |
| StopAF forward genotyping primer, PKO2226 | GAAAGCAGTGAGGGTTTAATGA            |
| StopAF reverse genotyping primer, PKO2237 | CATACAGTCCTCTTCACATCCA            |
| Recombination testing primer Pr1, PKO2226 | GAAAGCAGTGAGGGTTTAATGA            |
| Recombination testing primer Pr2, PKO174  | TGACTATATTTGGATGTCGAAG            |
| PKO2212                                   | GATACTCAAAGAGTTCAACTTAGAAGA       |
| Sequencing primer, PKO2222                | AAGGGGTCCCAGGGCTGTGCCT            |
| 5'Probe Forward, PKO380                   | GTGTATAATCACAGAAACAGGC            |

**Table S2: Related to Fig. 7. Real time PCR primers**

| <b>Primer name</b>         | <b>Primer Sequence (5' to 3')</b> |
|----------------------------|-----------------------------------|
| Emi2 Forward, PKO2144      | CTTGTATAGGGCTTGCTTG               |
| Emi2 Forward, PKO2145      | TTATACAGTGCTTGGAACG               |
| Emi2 Reverse, PKO2146      | GCCCCCTGAGCACTTGCT                |
| Emi2 Reverse, PKO2147      | CCTGGCAACCTTCACATA                |
| Cdk1 Forward, PKO2006      | ACGAGGTAGTGACGCTGTGG              |
| Cdk1 Reverse, PKO2007      | GCCCAGAGCTCTGAAGATCC              |
| cyclin B1 Forward, PKO2863 | GCAGAACAGTTGTGTGCCCA              |
| cyclin B1 Reverse, PKO2864 | GTCACAAAGGCGAAGTCACC              |
| SYCP3 Forward, PKO4716     | AGCCGCTGAGCAAACATCT               |
| SYCP3 Reverse, PKO4717     | CTGGAGCCTTTTCATCAGC               |
| Spata18 Forward, PKO4447   | GTGCTACACAGGATTTCCAAC             |
| Spata18 Reverse, PKO4448   | ACTTTCAGCCAGATCGTCTTG             |
| EF2 Forward, PKO3215       | CACTTACCATCCCCGTCAC               |
| EF2 Reverse, PKO3216       | CTTTGGGGTCGCAGCTCTTA              |

## Supplemental References

- Adhikari, D., Busayavalasa, K., Zhang, J., Hu, M., Risal, S., Bayazit, M.B., Singh, M., Diril, M.K., Kaldis, P., and Liu, K. (2016). Inhibitory phosphorylation of Cdk1 mediates prolonged prophase I arrest in female germ cells and is essential for female reproductive lifespan. *Cell Res* 26, 1212-1225.
- Berthet, C., Aleem, E., Coppola, V., Tessarollo, L., and Kaldis, P. (2003). Cdk2 knockout mice are viable. *Curr Biol* 13, 1775-1785.
- Lee, E.-C., Yu, D., Martinez de Velasco, J., Tessarollo, L., Swing, D.A., Court, D.L., Jenkins, N.A., and Copeland, N.G. (2001). A highly efficient *Escherichia coli*-based chromosome engineering system adapted for recombinogenic targeting and subcloning of BAC DNA. *Genomics* 73, 56-65.
- Lewandoski, M., Meyers, E.N., and Martin, G.R. (1997). Analysis of Fgf8 gene function in vertebrate development. *Cold Spring Harb Symp Quant Biol* 62, 159-168.
- Rodriguez, C.I., Buchholz, F., Galloway, J., Sequerra, R., Kasper, J., Ayala, R., Stewart, A.F., and Dymecki, S.M. (2000). High-efficiency deleter mice show that FLPe is an alternative to Cre-loxP. *Nat Genet* 25, 139-140.
